# Supplementary material
Source: PubMed Central journal article supplement (PMC3060256)
Supplement: 1013928108_pnas.201013928SI.pdf [file 1013928108_pnas.201013928SI.pdf]

# Supporting Information

Collignon et al. 10.1073/pnas.1013928108

## SI Text

**Behavioral Results.** As expected, because of the use of a staircase paradigm, no difference of performance was observed between groups or between tasks (Fig. S1 B and C). Moreover, the simple ANOVA testing the group effect on auditory–spatial and auditory–pitch resolution level did not show a significant between-group effect (Fig. S1D). In the pitch discrimination task, the mean distance between the probe (1,000 Hz, central position) and the target was 27 Hz ( $\pm 17$  Hz SD) in the sighted group and 16 Hz ( $\pm 20$  Hz) in the blind group. In the spatial discrimination task, the mean distance between the probe (1,000 Hz, central position) and the target was 276  $\mu$ s interaural time difference (ITD) and 2.76% interaural level difference (ILD) ( $\pm 198$   $\mu$ s ITD and 1.98% ILD) in the sighted group and 284  $\mu$ s ITD and 2.84% ILD ( $\pm 196$   $\mu$ s ITD and 1.96% ILD) in the blind group.

The lack of performance differences between the two groups may seem puzzling at a first glance, especially regarding the spatial task because several previous studies outlined superior performance of the congenitally blind (CB) over sighted individuals (SI) for this ability (see ref. 1 for a recent review on the topic). However, previous studies showing difference in performance between CB and SI groups in spatial tasks have demonstrated that such differences manifest when sounds are presented monaurally (2, 3) or in the periphery (4). In the present experiment, the spatial task required the lateralization of intracranial sounds perceived along a line joining the two ears (*Materials and Methods*, main text). These sounds lead to a near-centered intracranial perceived location, roughly estimated to the foveal–parafoveal border if we attempt to make a correspondence with 3D sounds (5). This strongly suggests that blind individuals use subtle spatial cues more efficiently than sighted controls, particularly the spectral content of the sound, which is one of the principal remaining cues for localizing a source under a monaural listening condition or for the localization of sounds in the periphery (6). However, in the present experiment intracranial sound locations were obtained by jointly adjusting the ITD and ILD of pure tone. No head-related transfer function, which includes spectral cues, was used because people only had to judge the location of sounds along the azimuth coordinate. Indeed, our absence of better performance in the CB group may be related to this absence of spectral content in the sounds used in the present experiment.

**Functional MRI Analysis.** The analysis of functional MRI (fMRI) data, based on a mixed-effects model, was conducted in two serial steps, accounting respectively for fixed and random effects. For each subject, changes in brain regional responses were estimated by a general linear model including the responses to the pitch and spatial conditions. These regressors consisted of boxcar function convolved with the canonical hemodynamic response function. The instruction preceding each block, movement parameters derived from realignment of the functional volumes (translations in x, y, and z directions and rotations around x, y, and z axes) and a constant vector were also included as covariates of no interest. High-pass filtering was implemented in the design matrix using a cutoff period of 128 s to remove slow drifts from the time series. Serial correlations in fMRI signal were estimated using an autoregressive (order 1) plus white-noise model and a restricted maximum likelihood algorithm.

Linear contrasts tested the main effect of each condition ([Pitch], [Spatial], [Spatial > Pitch], and [Pitch > Spatial]) and the main effect of general auditory processing ([Spatial + Pitch])

and generated statistical parametric maps [SPM(T)]. These summary statistics images were then further spatially smoothed (Gaussian kernel 6 mm FWHM) and entered in a second-level analysis, corresponding to a random-effects model, accounting for intersubject variance. One-sample *t* tests characterized the main effect of conditions ([Pitch], [Spatial], [Spatial > Pitch], and [Pitch > Spatial]) in SI and CB groups separately. A conjunction analysis based on a conjunction null hypothesis characterized brain areas jointly activated for the contrasts [Spatial > Pitch] and [Pitch > Spatial] in both groups (CI and SI). Two-sample *t* tests were then performed to identify group effects independent of the condition ([CB > SI]  $\times$  [Spatial + Pitch]) and to explore group  $\times$  condition interaction effects ([CB > SI]  $\times$  [Pitch > Spatial] and [CB > SI]  $\times$  [Spatial > Pitch]). Two-sample *t* tests were also performed to investigate group effect for each condition separately ([CB > SI]  $\times$  [Spatial]; [CB > SI]  $\times$  [Pitch]; [SI > CB]  $\times$  [Spatial]; [SI > CB]  $\times$  [Pitch]; see Table S5). Main effects of condition in each group were used as inclusive or exclusive masks to identify which group was driving the interaction effects.

The resulting set of voxel values for each contrast constituted a map of the *t* statistic [SPM(T)], thresholded at  $P < 0.001$  (uncorrected for multiple comparisons; *Z* threshold of 3.09). Statistical inferences were performed at a threshold of  $P < 0.05$  after correction for multiple comparisons over either the entire brain volume or over small spherical volumes (10-mm radius), located in structures of interest. Significant clusters were anatomically labeled using structural neuroanatomy information and probabilistic cytoarchitectonic maps provided in Anatomy Toolbox 1.7b (7) or using a brain atlas for brain regions not covered by this toolbox (8).

Psychophysiological interaction (PPI) analyses (9) were computed to identify any brain regions showing a significant change in the functional connectivity with a seed region (the right cuneus, the right middle occipital gyrus, the right middle occipitotemporal gyrus, and the right lingual gyrus) as a function of the experimental condition ([Spatial, Pitch]) in the CB group. Indeed, PPI analyses were conducted to test the hypothesis that functional connectivity between seed regions and the rest of the brain not only differed between conditions (Spatial vs. Pitch) but was also influenced by the experimental group (CB or SI). In each individual, time-series of activity from the seed area were extracted from the local maxima detected within 10 mm of the peaks identified in the [CB > SI]  $\times$  [Spatial > Pitch] contrast. New linear models were generated at the individual level, using three regressors. One regressor represented the condition (Spatial > Pitch). The second regressor was the activity extracted in the reference area. The third regressor represented the interaction of interest between the first (psychological) and the second (physiological) regressor. To build this regressor, the underlying neuronal activity was first estimated by a parametric empirical Bayes formulation, combined with the psychological factor and subsequently convolved with the hemodynamic response function (10). The design matrix also included movement parameters. A significant PPI indicated a change in the regression coefficients between any reported brain area and the reference region, related to the experimental condition (Spatial > Pitch) in CB. Next, individual summary statistic images obtained at the first level (fixed-effects) analysis were spatially smoothed (6-mm FWHM Gaussian kernel) and entered in a second-level (random-effects) analysis using a one-sample *t* test. Inferences were conducted as for the main-effect analysis. PPI carried out in the SI with the same seed areas were used as exclusive masks ( $P = 0.05$ ) to ensure that the pattern of functional connectivity with the seeds

areas that is present in CB is not present in SI. These analyses allow exploration of the functional connectivity between any seed area and the rest of the brain, in CB, during Spatial sound processing compared with Pitch processing.

Finally, in the random-effects analyses, posterior probability maps (PPMs) enabling conditional or Bayesian inferences about regionally specific effects were performed (11). PPMs represent a powerful complementary approach to classic statistical parametric maps inferences (11). This type of analysis allows controlling that one seed area activated in one group (CB) presents a low probability of activation in the other group (SI). This is of particular interest in the case of the present study because it gives a direct measurement of the intrinsic probability of activation in SI of regions showing significantly more activity in CB than SI. PPMs and effect size were computed for the contrasts [Spatial + Pitch] and [Spatial > Pitch] in the CB group to verify that seed areas (using 10-mm volume of interest around activation peaks) obtained with [CB > SI] in these contrasts (the right middle occipital gyrus, the left calcarine gyrus, and the left middle occipital gyrus for [Spatial+Pitch]; the right cuneus, the right middle occipital gyrus, and the right lingual gyrus for [Spatial > Pitch]) have a low probability of activation in the SI group.

**Coordinates of Areas of Interest Used for Spherical Small-Volume Corrections.** Literature reporting brain activations related to auditory-pitch or auditory-spatial processing in blind and sighted subjects was considered for selecting coordinates of interest, depending of the contrast of interest. Before performing any small-volume correction (svc), peaks reported in Talairach (Talairach and Tournoux, 1988) space were transformed to Montreal Neurological Institute space using Matthew Brett's bilinear transformation (<http://imaging.mrc-cbu.cam.ac.uk/imaging/MniTalairach>); no coordinates were shifted more than 5 mm). Standard stereotactic coordinates of previously published a priori locations, used for spherical svc, are as follows:

- Collignon O, Voss P, Lassonde M, Lepore F (2009) Cross-modal plasticity for the spatial processing of sounds in visually deprived subjects. *Exp Brain Res* 192:343–358.
- Lessard N, Paré M, Lepore F, Lassonde M (1998) Early-blind human subjects localize sound sources better than sighted subjects. *Nature* 395:278–280.
- Gougoux F, Zatorre RJ, Lassonde M, Voss P, Lepore F (2005) A functional neuroimaging study of sound localization: Visual cortex activity predicts performance in early-blind individuals. *PLoS Biol* 3:e27.
- Röder B, et al. (1999) Improved auditory spatial tuning in blind humans. *Nature* 400:162–166.
- Blauert J (1997) *Spatial Hearing: The Psychophysics of Human Sound Localization* (MIT Press, Cambridge, MA).
- Van Wanrooij MM, Van Opstal AJ (2004) Contribution of head shadow and pinna cues to chronic monaural sound localization. *J Neurosci* 24:4163–4171.
- Eickhoff SB, et al. (2007) Assignment of functional activations to probabilistic cytoarchitectonic areas revisited. *Neuroimage* 36:511–521.
- Mai J, Patxinós G, Voss T (2007) *Atlas of the Human Brain* (Elsevier, New York), 3rd Ed.
- Friston KJ, et al. (1997) Psychophysiological and modulatory interactions in neuroimaging. *Neuroimage* 6:218–229.
- Gitelman DR, Penny WD, Ashburner J, Friston KJ (2003) Modeling regional and psychophysiological interactions in fMRI: The importance of hemodynamic deconvolution. *Neuroimage* 19:200–207.
- Friston KJ, Penny W (2003) Posterior probability maps and SPMs. *Neuroimage* 19:1240–1249.
- Rämä P, et al. (2004) Dissociable functional cortical topographies for working memory maintenance of voice identity and location. *Cereb Cortex* 14:768–780.
- Weeks RA, et al. (1999) A PET study of human auditory spatial processing. *Neurosci Lett* 262:155–158.
- Paus T (1996) Location and function of the human frontal eye-field: A selective review. *Neuropsychologia* 34:475–483.
- Garg A, Schwartz D, Stevens AA (2007) Orienting auditory spatial attention engages frontal eye fields and medial occipital cortex in congenitally blind humans. *Neuropsychologia* 45:2307–2321.
- Poirier C, et al. (2005) Specific activation of the V5 brain area by auditory motion processing: An fMRI study. *Brain Res Cogn Brain Res* 25:650–658.
- Bushara KO, et al. (1999) Modality-specific frontal and parietal areas for auditory and visual spatial localization in humans. *Nat Neurosci* 2:759–766.
- Griffiths TD, et al. (1998) Right parietal cortex is involved in the perception of sound movement in humans. *Nat Neurosci* 1:74–79.
- Zatorre RJ, Bouffard M, Belin P (2004) Sensitivity to auditory object features in human temporal neocortex. *J Neurosci* 24:3637–3642.
- Voss P, Gougoux F, Zatorre RJ, Lassonde M, Lepore F (2008) Differential occipital responses in early- and late-blind individuals during a sound-source discrimination task. *Neuroimage* 40:746–758.
- Maeder PP, et al. (2001) Distinct pathways involved in sound recognition and localization: a human fMRI study. *Neuroimage* 14:802–816.
- Alain C, Arnott SR, Hevenor S, Graham S, Grady CL (2001) "What" and "where" in the human auditory system. *Proc Natl Acad Sci USA* 98:12301–12306.
- Zatorre RJ, Evans AC, Meyer E (1994) Neural mechanisms underlying melodic perception and memory for pitch. *J Neurosci* 14:1908–1919.
- Kiehl KA, Laurens KR, Duty TL, Forster BB, Liddle PF (2001) Neural sources involved in auditory target detection and novelty processing: an event-related fMRI study. *Psychophysiology* 38:133–142.
- Poirier C, et al. (2006) Auditory motion perception activates visual motion areas in early blind subjects. *Neuroimage* 31:279–285.
- Poeppl D, et al. (2004) Auditory lexical decision, categorical perception, and FM direction discrimination differentially engage left and right auditory cortex. *Neuropsychologia* 42:183–200.
- Barrett DJ, Hall DA (2006) Response preferences for "what" and "where" in human non-primary auditory cortex. *Neuroimage* 32:968–977.
- Hall DA, Plack CJ (2009) Pitch processing sites in the human auditory brain. *Cereb Cortex* 19:576–585.
- Renier LA, et al. (2009) Multisensory integration of sounds and vibrotactile stimuli in processing streams for "what" and "where". *J Neurosci* 29:10950–10960.
- Peck KK, et al. (2009) Event-related functional MRI investigation of vocal pitch variation. *Neuroimage* 44:175–181.
- Tootell RB, et al. (1995) Functional analysis of human MT and related visual cortical areas using magnetic resonance imaging. *J Neurosci* 15:3215–3230.
- Weeks R, et al. (2000) A positron emission tomographic study of auditory localization in the congenitally blind. *J Neurosci* 20:2664–2672.
- Haxby JV, et al. (1994) The functional organization of human extrastriate cortex: A PET-CBF study of selective attention to faces and locations. *J Neurosci* 14:6336–6353.
- Weaver KE, Stevens AA (2007) Attention and sensory interactions within the occipital cortex in the early blind: an fMRI study. *J Cogn Neurosci* 19:315–330.
- Zimmer U, Lewald J, Erb M, Grodd W, Karnath HO (2004) Is there a role of visual cortex in spatial hearing? *Eur J Neurosci* 20:3148–3156.
- Oldfield RC (1971) The assessment and analysis of handedness: The Edinburgh inventory. *Neuropsychologia* 9:97–113.

Global processing of sounds [Spatial + Pitch]

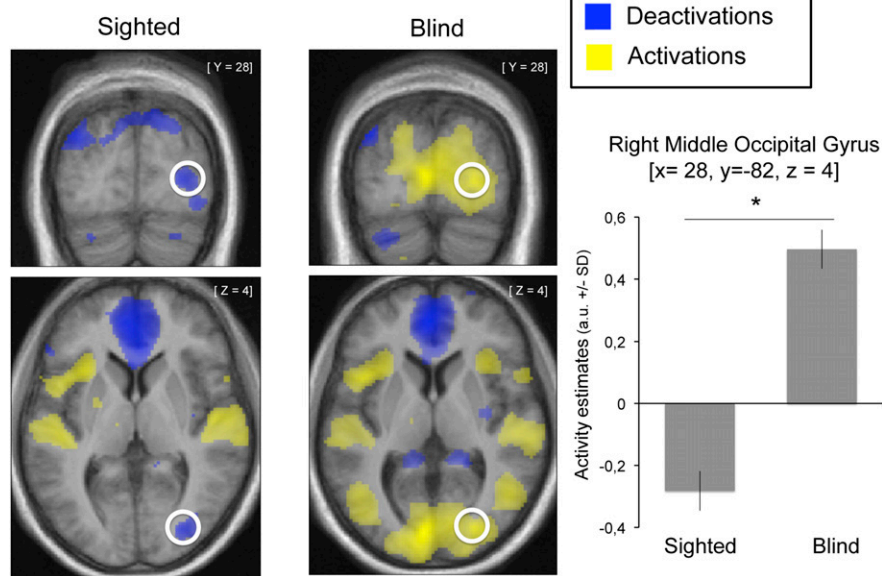

**Fig. 51.** Activations (yellow) and deactivations (blue) obtained on contrasts testing the main effects of global sound processing [Spatial + Pitch] in both groups separately. Functional data are displayed ( $P_{\text{uncorrected}} < 0.001$ ) over coronal and horizontal sections of the mean structural image of all blind subjects and of all sighted subjects respectively normalized to the same stereotactic space. *Right:* Mean activity estimates (arbitrary unit  $\pm$  SEM) associated with sound processing [Spatial + Pitch] in the sighted and the blind groups for peak activation and peak deactivation estimates in the right middle occipital gyrus in both groups separately. One can see that this region is strongly activated in blind subjects, whereas it shows deactivation in sighted subjects.

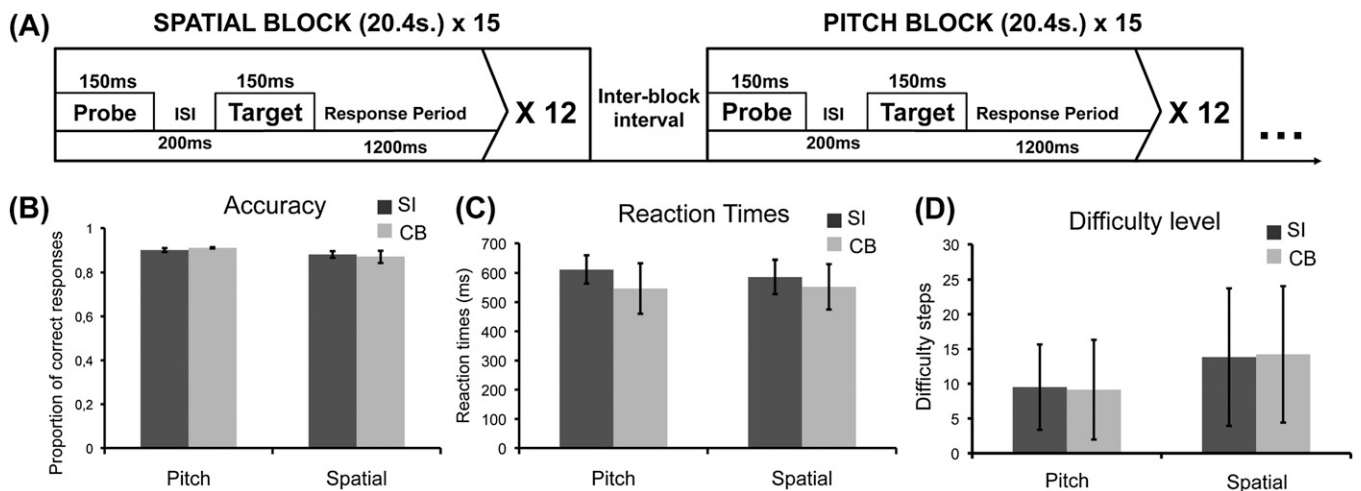

**Fig. 52.** Experimental design and behavioral results. (A) fMRI acquisition design. Performance in the scanner is illustrated by the accuracy scores (B) and the reaction times (C) in both tasks, as well as by the spatial and the pitch difficulty level (D) of these tasks. No between-group or between-task effects were found to be significant.

**Table S1. Functional results for the main effect of condition ([Pitch > Spatial] and [Spatial > Pitch]) in conjunction in each group (SI and CB)**

| Area                                                  | Cluster size | x (mm) | y (mm) | z (mm) | Z    | P      |
|-------------------------------------------------------|--------------|--------|--------|--------|------|--------|
| Conjunction [CB $\cap$ SI] $\times$ [Spatial – Pitch] |              |        |        |        |      |        |
| R superior frontal gyrus                              | 1,308        | 32     | 0      | 48     | 5.34 | 0.002* |
| R middle occipito-temporal gyrus                      | 690          | 48     | -54    | 10     | 5.31 | 0.000  |
| R inferior parietal lobule                            | 1,444        | 52     | -40    | 30     | 4.95 | 0.005  |
| R middle frontal gyrus                                | 340          | 40     | 56     | 16     | 4.29 | 0.001  |
| R precuneus-superior parietal lobule                  | 385          | 4      | -52    | 60     | 4.23 | 0.001  |
| L inferior frontal gyrus                              | 64           | -40    | 50     | -6     | 3.58 | 0.01   |
| R insula-R inferior frontal gyrus                     | 107          | 46     | 22     | -8     | 3.54 | 0.024  |
| R middle frontal gyrus                                | 32           | 44     | 06     | 30     | 3.30 | 0.025  |
| Conjunction [CB $\cap$ SI] $\times$ [Pitch – Spatial] |              |        |        |        |      |        |
| R anterior inferior temporal gyrus                    | 35           | 44     | 0      | -32    | 4.24 | 0.024  |
| L anterior planum polare                              | 405          | -24    | 4      | -20    | 4.15 | 0.013  |
| L inferior frontal gyrus/insula                       | 90           | -46    | 06     | 04     | 4.12 | 0.002  |
| L posterior middle temporal gyrus                     | 207          | -42    | -36    | 02     | 4.12 | 0.006  |
| L precentral gyrus                                    | 75           | -38    | -24    | 66     | 3.41 | 0.016  |
| L middle temporal gyrus                               | 21           | -48    | -22    | -12    | 3.31 | 0.034  |

Brain activations significant after correction over the entire volume (\*) or over small volume of interest (svc). R, right; L, left.

**Table S2. Summary of the PPI analyses (functional connectivity analyses) performed on the [Spatial > Pitch] contrast in CB**

| Seed area for PPI analyses in CB     | Cluster size | x (mm) | y (mm) | z (mm) | Z    | P     |
|--------------------------------------|--------------|--------|--------|--------|------|-------|
| Right cuneus                         |              |        |        |        |      |       |
| R superior frontal gyrus             | 31           | 18     | -12    | 60     | 3.87 | 0.005 |
|                                      | —            | 22     | -18    | 70     | 3.26 | 0.028 |
| L superior frontal gyrus             | 84           | -14    | -10    | 64     | 3.86 | 0.006 |
| R inferior parietal lobule           | 25           | 58     | -30    | 54     | 3.49 | 0.021 |
|                                      | —            | 64     | -24    | 46     | 3.26 | 0.027 |
| R middle frontal gyrus               | 7            | 56     | 22     | 36     | 3.45 | 0.037 |
| L inferior parietal lobule           | 34           | -64    | -24    | 40     | 3.34 | 0.028 |
| L inferior parietal lobule           | 7            | -66    | -22    | 30     | 3.23 | 0.029 |
| R middle frontal gyrus               | 1            | 50     | 38     | 26     | 3.13 | 0.037 |
| R inferior parietal lobule           | 1            | 30     | -38    | 40     | 3.11 | 0.038 |
| Right lateral occipital gyrus        |              |        |        |        |      |       |
| R inferior parietal lobule           | 29           | 32     | -38    | 38     | 3.71 | 0.013 |
| L superior frontal gyrus             | 66           | -16    | -12    | 58     | 3.70 | 0.010 |
| R cuneus                             | 42           | 14     | -84    | 38     | 3.58 | 0.014 |
| R cerebellum                         | 17           | 14     | -72    | -44    | 3.26 | 0.027 |
| Right middle occipito-temporal gyrus |              |        |        |        |      |       |
| R inferior frontal gyrus             | 14           | 52     | 10     | 6      | 3.24 | 0.026 |
| R superior frontal gyrus             | 6            | 6      | 6      | 60     | 3.21 | 0.028 |
| R supramarginal gyrus                | 8            | 36     | -40    | 42     | 3.18 | 0.030 |
| Right lingual gyrus                  |              |        |        |        |      |       |
| R inferior parietal lobule           | 26           | 32     | -34    | 42     | 3.4  | 0.038 |

Brain activations significant after correction over small volume of interest (svc). All of the clusters reported in the table are not affected by an exclusive mask ( $P = 0.05$ ) of the PPI carried out in the sighted subjects with the same seeds areas, further indicating that the reported regions present a pattern of functional connectivity with the seeds areas that is present on CB but not on SI. R, right; L, left.

**Table S3. Small-volume correction analysis done around the Montreal Neurological Institute coordinate 44, -77, -2, identified as hMT+/V5 by Tootell et al. (1) and coordinate 24, -76, 24, identified as a visuospatial region by Haxby et al. (2)**

| Subjects              | Cluster size | Coordinates |        |        | Z    | P     |
|-----------------------|--------------|-------------|--------|--------|------|-------|
|                       |              | x (mm)      | y (mm) | z (mm) |      |       |
| hMT+/V5 (44, -77, -2) |              |             |        |        |      |       |
| CB1                   | 8            | 46          | -66    | -12    | 3.56 | 0.041 |
| CB2                   | 629          | 44          | -72    | 12     | >8   | 0.000 |
| CB3                   | 1,255        | 44          | -66    | -2     | >8   | 0.000 |
| CB4                   | 42           | 48          | -66    | 8      | 4.32 | 0.003 |
| CB5                   | 4            | 52          | -64    | 2      | 4.16 | 0.007 |
| CB6                   | —            | —           | —      | —      | —    | —     |
| CB7                   | 249          | 36          | -76    | -10    | 4.86 | 0.000 |
| CB8                   | 48           | 40          | -76    | -2     | 3.82 | 0.021 |
| CB9                   | 245          | 48          | -74    | 12     | 4.26 | 0.004 |
| CB10                  | 27           | 52          | -70    | 8      | 4.2  | 0.004 |
| CB11                  | —            | —           | —      | —      | —    | —     |
| V3/V3A (24, -76, 24)  |              |             |        |        |      |       |
| CB1                   | 264          | 22          | -84    | 34     | 5.53 | 0.000 |
| CB2                   | 678          | 18          | -70    | 34     | 6.72 | 0.000 |
| CB3                   | 1305         | 24          | -86    | 20     | >8   | 0.000 |
| CB4                   | 4            | 28          | -78    | 38     | 3.46 | 0.05  |
| CB5                   | 673          | 24          | -84    | 36     | 7.25 | 0.000 |
| CB6                   | —            | —           | —      | —      | —    | —     |
| CB7                   | 260          | 16          | -74    | 26     | 5.45 | 0.000 |
| CB8                   | 40           | 32          | -88    | 22     | 3.57 | 0.000 |
| CB9                   | 372          | 38          | -80    | 26     | 5.76 | 0.000 |
| CB10                  | 176          | 36          | -82    | 18     | 5.3  | 0.000 |
| CB11                  | 48           | 22          | -66    | 16     | 3.67 | 0.033 |

Brain activations significant after correction over small spherical volume of interest (15-mm radius), centered on the above-mentioned coordinates.

1. Tootell RB, et al. (1995) Functional analysis of human MT and related visual cortical areas using magnetic resonance imaging. *J Neurosci* 15:3215–3230.
2. Haxby JV, et al. (1994) The functional organization of human extrastriate cortex: A PET-rCBF study of selective attention to faces and locations. *J Neurosci* 14:6336–6353.

**Table S4. Characteristics of the blind subjects**

| Subject | Age (y) | Sex | Hand | Residual visual perception | Onset | Cause of blindness           | Education   | Musical experience |
|---------|---------|-----|------|----------------------------|-------|------------------------------|-------------|--------------------|
| CB1     | 32      | F   | R    | No                         | 0     | Glaucoma                     | High school | No                 |
| CB2     | 43      | M   | R    | No                         | 0     | Glaucoma                     | University  | Yes                |
| CB3     | 39      | M   | R    | Diffuse light              | 0     | Leber's congenital amaurosis | University  | No                 |
| CB4     | 56      | F   | R    | No                         | 0     | Retinopathy of prematurity   | High school | No                 |
| CB5     | 38      | M   | R    | No                         | 0     | Detached retina              | High school | Yes                |
| CB6     | 31      | F   | R    | No                         | 0     | Bilateral Retinoblastoma     | High school | No                 |
| CB7     | 26      | M   | R    | No                         | 0     | Leber's congenital amaurosis | University  | Yes                |
| CB8     | 30      | M   | R    | No                         | 0     | Bilateral retinoblastoma     | High school | Yes                |
| CB9     | 46      | M   | R    | No                         | 0     | Congenital Cataract          | University  | Yes                |
| CB10    | 40      | M   | R    | No                         | 0     | Retinopathy of prematurity   | University  | Yes                |
| CB11    | 27      | F   | R    | No                         | 0     | Retinopathy of prematurity   | High school | No                 |

Handedness was evaluated using an adapted version of the Edinburgh inventory (1). CB and SI were classified as "musician" if they currently practice or have practiced an instrument or vocal for more than 2 y on a regular basis (at least 2 h a week). M, male; F, female; R, right handed; L, left handed; A, ambidextrous.

1. Oldfield RC (1971) The assessment and analysis of handedness: The Edinburgh inventory. *Neuropsychologia* 9:97–113.

**Table S5. Brain activations ( $P < 0.001$ , uncorrected) related to the main effects observed in our tasks**

| Area                                      | Cluster size | x (mm) | y (mm) | z (mm) | Z     |
|-------------------------------------------|--------------|--------|--------|--------|-------|
| <b>Task effect [Spatial &gt; Pitch]</b>   |              |        |        |        |       |
| Sighted                                   |              |        |        |        |       |
| R inferior parietal lobule                | 426          | 68     | -32    | 38     | 4.27  |
|                                           | —            | 62     | -42    | 48     | 3.89  |
|                                           | —            | 52     | -40    | 32     | 3.85  |
| R precentral gyrus                        | 64           | 32     | 0      | 48     | 3.53  |
| R middle occipito-temporal gyrus          | 28           | 48     | -54    | 10     | 3.50  |
| R middle frontal gyrus                    | 15           | 34     | 60     | 8      | 3.25  |
| Blind                                     |              |        |        |        |       |
| R middle occipital gyrus                  | 3,179        | 50     | -52    | 6      | 5.22* |
|                                           | —            | 50     | -64    | 10     | 4.78* |
|                                           | —            | 12     | -80    | 22     | 4.11  |
| R inferior parietal lobule                | 283          | 36     | -40    | 40     | 3.94  |
| R superior frontal gyrus                  | 43           | 24     | 10     | 68     | 3.72  |
| R middle frontal gyrus                    | 254          | 34     | 2      | 52     | 3.66  |
|                                           | —            | 46     | -2     | 52     | 3.38  |
| R lingual gyrus                           | 68           | 24     | -66    | -2     | 3.33  |
| <b>Task effect [Pitch &gt; Spatial]</b>   |              |        |        |        |       |
| Sighted                                   |              |        |        |        |       |
| R central sulcus                          | 128          | 58     | -10    | 50     | 4.67* |
| R posterior superior temporal gyrus       | 287          | 46     | -30    | -6     | 4.45  |
| R anterior inferior temporal cortex       | 171          | 44     | -4     | -32    | 3.96  |
| L insula                                  | 647          | -42    | -24    | 22     | 3.96  |
| L putamen                                 | —            | -20    | 6      | 10     | 3.56  |
| L inferior frontal gyrus (opercular part) | 61           | -58    | -8     | 16     | 3.74  |
| L middle/superior temporal gyrus          | 221          | -52    | -36    | 4      | 3.73  |
| R cerebellum                              | 31           | 28     | -72    | -34    | 3.43  |
| L cerebellum                              | 20           | -26    | -54    | -18    | 3.35  |
| Blind                                     |              |        |        |        |       |
| No significant responses                  |              |        |        |        |       |
| <b>Group effect [Blind &gt; Sighted]</b>  |              |        |        |        |       |
| Spatial                                   |              |        |        |        |       |
| R lateral occipital gyrus                 | 11,950       | 32     | -80    | -2     | 6.06* |
| L calcarine                               | —            | -6     | -86    | 6      | 4.96* |
| R lateral occipital gyrus                 | —            | 46     | -64    | 8      | 4.70* |
| Pitch                                     |              |        |        |        |       |
| L calcarine                               | 5,474        | -6     | -84    | 2      | 4.95* |
| L superior occipital gyrus                | —            | -20    | -78    | 30     | 4.90* |
| R lateral occipital gyrus                 | —            | 26     | -82    | 4      | 4.73* |
| <b>Group effect [Sighted &gt; Blind]</b>  |              |        |        |        |       |
| Spatial                                   |              |        |        |        |       |
| R middle temporal gyrus                   | 58           | 64     | -8     | -14    | 4.43  |
| R hippocampus                             | 67           | 24     | -22    | -10    | 4.05  |
| R angular gyrus                           | 202          | 50     | -62    | 38     | 3.95  |
| Pitch                                     |              |        |        |        |       |
| R angular gyrus                           | 50           | 46     | -64    | 46     | 4.16  |
| R hippocampus                             | 12           | 26     | -40    | -4     | 3.26  |
| <b>Main effects separately</b>            |              |        |        |        |       |
| Spatial in sighted                        |              |        |        |        |       |
| L premotor/motor cortex                   | 5,924        | -34    | -10    | 52     | 5.69* |
| R superior temporal gyrus (A1)            | 1,119        | 66     | -26    | 12     | 5.14* |
| R cerebellum                              | 939          | 12     | -72    | 20     | 5.05* |
| L superior temporal gyrus (A1)            | 903          | -64    | -18    | 12     | 4.3   |
| R cerebellum                              | 116          | 22     | -62    | -50    | 4.02  |
| L cerebellum                              | 68           | -24    | -64    | -50    | 3.66  |
| L cerebellum                              | 132          | -28    | -64    | -26    | 3.66  |
| L inferior parietal lobule                | 12           | -48    | -38    | 56     | 3.27  |
| Pitch in sighted                          |              |        |        |        |       |
| L premotor/motor cortex                   | 7,081        | -6     | 8      | 54     | 5.88* |
| R cerebellum                              | 1,607        | 34     | -64    | 26     | 5.17* |
| R superior temporal gyrus (A1)            | 1,227        | 64     | -26    | 10     | 5.11* |
| R inferior frontal gyrus                  | 387          | 58     | 14     | 20     | 4.56  |
| R precentral gyrus                        | 399          | 56     | 2      | 48     | 4.31  |

**Table S5. Cont.**

| Area                                | Cluster size | x (mm) | y (mm) | z (mm) | Z     |
|-------------------------------------|--------------|--------|--------|--------|-------|
| R cerebellum                        | 113          | 22     | -64    | -50    | 3.95  |
| L cerebellum                        | 165          | -28    | -62    | -24    | 3.75  |
| L thalamus/putamen                  | 247          | -14    | -16    | 6      | 3.68  |
| L cerebellum                        | 12           | -22    | -64    | -50    | 3.23  |
| Spatial in blind                    |              |        |        |        |       |
| L cuneus/primary visual cortex (V1) | 14,966       | -6     | -86    | 6      | 6.27* |
| L premotor/motor cortex             | 8,929        | -34    | -10    | 52     | 5.86* |
| L intraparietal sulcus              | —            | -38    | -42    | 48     | 5.15* |
| R superior temporal gyrus (A1)      | 1,561        | 64     | -26    | 10     | 5.69* |
| L superior temporal gyrus (A1)      | 1,511        | -60    | -32    | 12     | 4.96* |
| R intraparietal sulcus              | 398          | 42     | -40    | 44     | 4.36  |
| R superior frontal gyrus            | 181          | 38     | 38     | 28     | 4.06  |
| L brainstem                         | 21           | -6     | -22    | -8     | 3.81  |
| R superior parietal lobule          | 98           | 30     | -56    | 54     | 3.45  |
| R brainstem                         | 5            | 6      | -22    | -10    | 3.33  |
| Pitch in blind                      |              |        |        |        |       |
| L cuneus/primary visual cortex (V1) | 10,453       | -6     | -84    | 4      | 6.26* |
| L premotor/motor cortex             | 7,581        | -12    | -2     | 62     | 6.08* |
| R superior temporal gyrus (A1)      | 1,624        | 64     | -26    | 10     | 5.89* |
| L superior temporal gyrus (A1)      | 1,884        | -58    | -32    | 12     | 5.66* |
| L occipito-temporal gyrus           | 532          | -44    | -62    | 6      | 4.54  |
| R occipito-temporal gyrus           | 252          | 46     | -60    | 6      | 4.48  |
| R insula                            | 251          | 32     | 20     | 6      | 4.2   |
| R inferior frontal gyrus            | 463          | 58     | 12     | 8      | 4.11  |
| R intraparietal sulcus              | 81           | 42     | -36    | 42     | 3.6   |
| R superior frontal gyrus            | 22           | 36     | 38     | 28     | 3.48  |
| L thalamus                          | 26           | -14    | -16    | 6      | 3.39  |

\*Significant after correction over the entire volume at  $P < 0.05$ .
